# Supplementary material for: Lactobacillus spp. attenuate antibiotic-induced immune and microbiota dysregulation in honey bees
Source: PubMed Central journal article supplement (PMC7519052; doi:10.1038/s42003-020-01259-8), 2020-09-25
Supplement: 42003_2020_1259_MOESM1_ESM.pdf [file 42003_2020_1259_MOESM1_ESM.pdf]

# Supplementary Information

---

## ***Lactobacillus* spp. attenuate antibiotic-induced immune and microbiota dysregulation in honey bees**

Brendan A. Daisley<sup>1,2</sup>, Andrew P. Pitek<sup>3</sup>, John A. Chmiel<sup>1,2</sup>, Shaeley Gibbons<sup>1</sup>, Anna M. Chernyshova<sup>3</sup>, Kait F. Al<sup>1,2</sup>, Kyriillos M. Faragalla<sup>3</sup>, Jeremy P. Burton<sup>1,2,4</sup>, Graham J. Thompson<sup>3</sup>, and Gregor Reid<sup>1,2,4,#</sup>.

<sup>1</sup>Centre for Human Microbiome and Probiotic Research, Lawson Health Research Institute, London, Ontario, Canada; <sup>2</sup>Department of Microbiology and Immunology, The University of Western Ontario, London, Ontario, Canada; <sup>3</sup>Department of Biology, The University of Western Ontario, London, Ontario, Canada; <sup>4</sup>Department of Surgery, The University of Western Ontario, London, Ontario, Canada.

# Address correspondence to Dr. Gregor Reid, [gregor@uwo.ca](mailto:gregor@uwo.ca)

---

### **This PDF file includes:**

Supplementary Figures 1-4  
Supplementary Tables 1-2

### **Other Supplementary Materials for this manuscript include the following:**

Supplementary Datasets 1-3

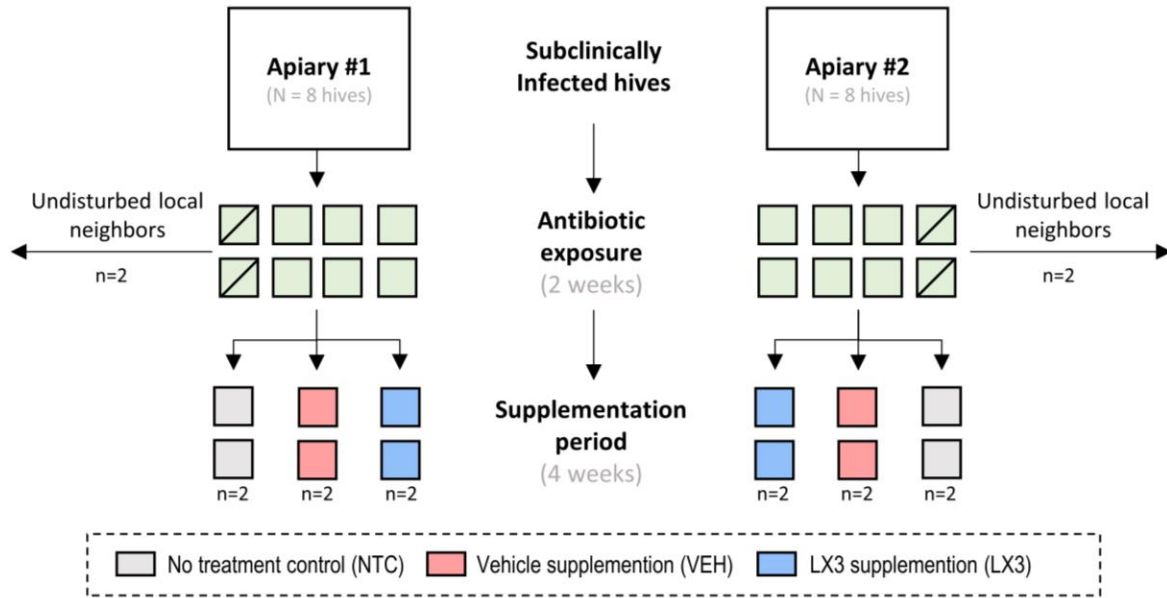

30

31 **Supplementary Figure 1. Schematic diagram of experimental overview.** Experimental apiaries were chosen on the basis of their inclusion  
 32 within a boundary assessed to have a recent increase of AFB incidence as denoted through provincial apiary inspection by the Ontario Ministry of  
 33 Agriculture and Food and Ministry of Rural Affairs. All hives received standard treatment with oxytetracycline hydrochloride (OTC) for two-  
 34 weeks. Two hives in each apiary were then left to freely interact with experimental hives in an effort to emulate realistic buffering conditions of  
 35 undisturbed local neighboring colonies. The remaining hives were longitudinally monitored for an additional four weeks while receiving either no  
 36 treatment as a negative control (NTC), pollen patty supplementation as a vehicle control(VEH), or pollen patty with LX3 supplementation (LX3).

37

38

39

40

41

42

43

44

45

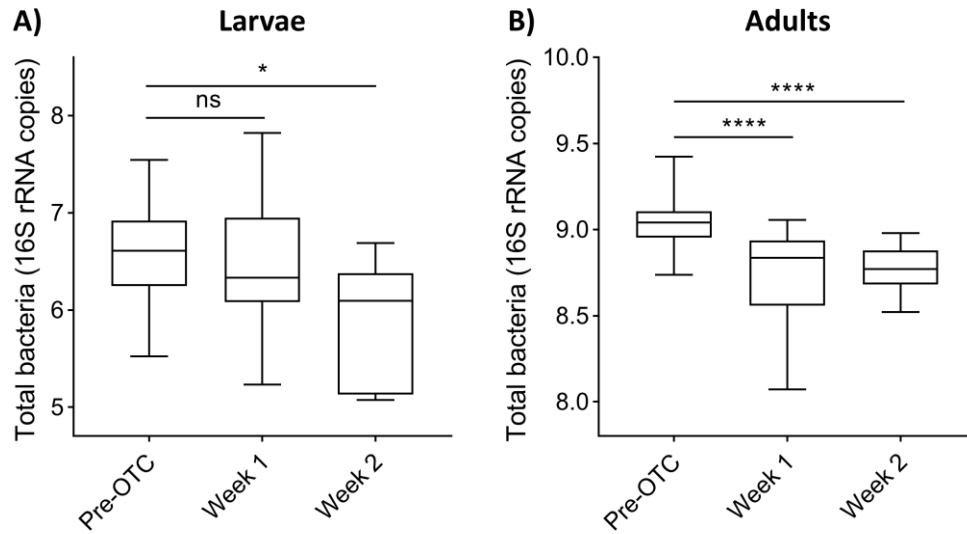

46

47

48

49

50

51

52

**Supplementary Figure 2. Total bacterial loads in honey bee adults and larvae during antibiotic treatment.** Experimental hives were subjected to standard antibiotic treatment (OTC) for two weeks. Total bacterial loads in surface-sterilized (A) adults (dissected abdomens) and (B) larvae (whole bodies) were quantified via qPCR directly prior to hive administration with oxytetracycline (pre-abx) and a one-week intervals thereafter. Data represents the median (line in box), IQR (box), and minimum/maximum (whiskers) of n = 18 individual adult samples and n = 12 pooled larval samples (three larvae per pooled sampled) at each time point (Kruskal-Wallis with Dunn's multiple comparisons). ns = not significant, \*P < 0.05, \*\*\*\*P < 0.0001.

53

54

55

56

57

58

59

60

61

62

63

64

65

66

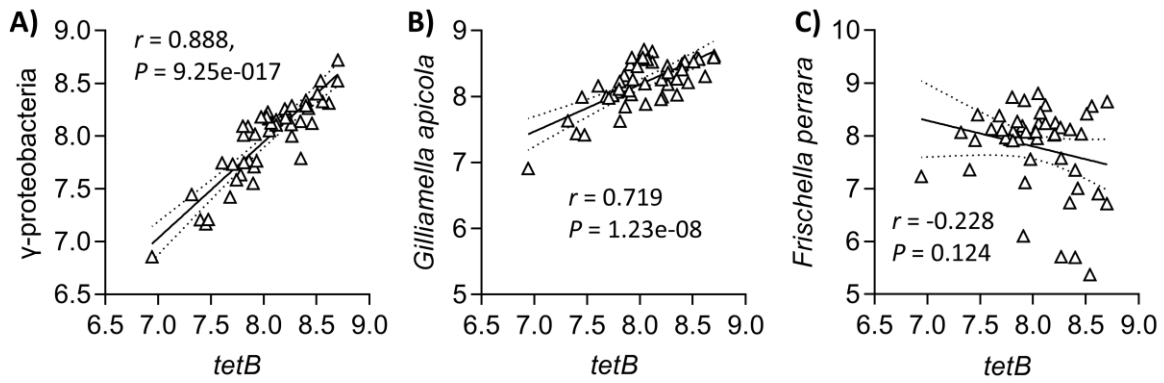

67

68 **Supplementary Figure 3. Association between Gammaproteobacteria and *tetB* abundance in adult honey bees.** After the six-week  
 69 experimental period of antibiotic treatment followed by probiotic supplementation, intra-individual abundance of (A) total Gammaproteobacteria,  
 70 (B) *Gilliamella apicola*, and (C) *Frischella perrara* was compared with *tetB* abundance. Data shown on log<sub>10</sub> scale.  $r$  = Pearson correlation  
 71 coefficient. N=48 adult gut samples. Simple linear regression (solid line) with 95% confidence interval (dotted lines) is shown for each.

72

73

74

75

76

77

78

79

80

81

82

83

84

85

86

87

88

89

## Heads

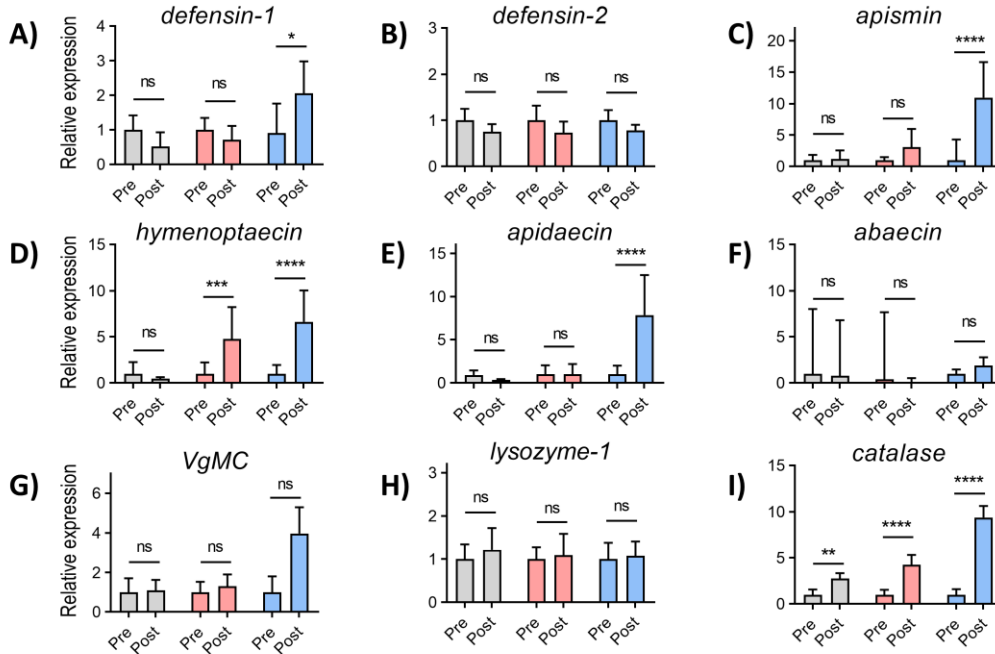

## Guts

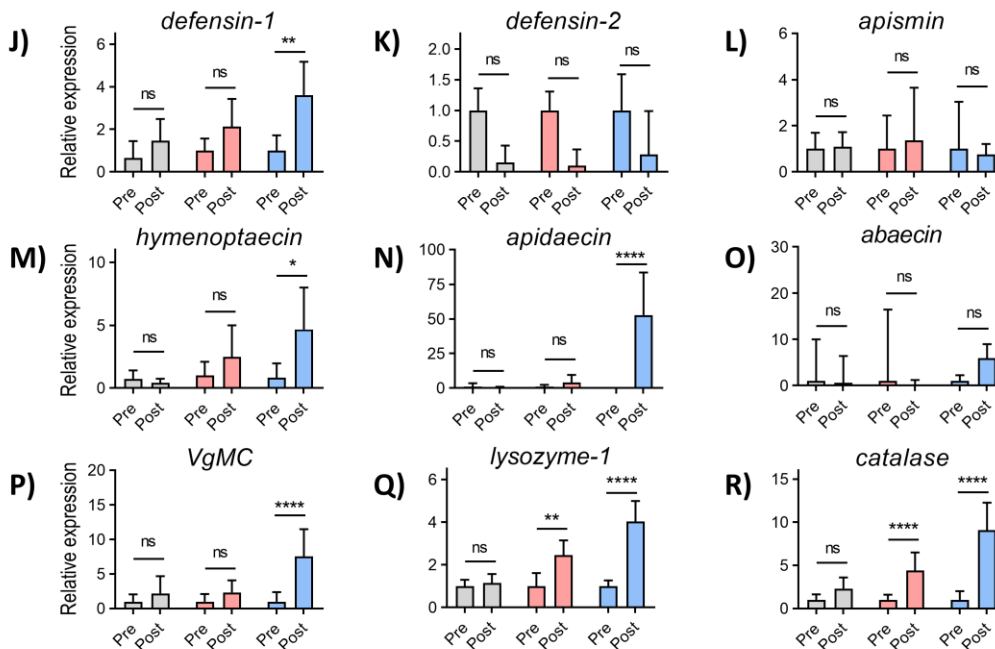

90

91 **Supplementary Figure 4. Immune- and antioxidant-related gene expression in honey bee adults following in-hive LX3 supplementation.**  
 92 Hives received standard treatment with oxytetracycline hydrochloride for two weeks and then were longitudinally monitored for an additional  
 93 four-week supplementation period in which hives received either no further treatment (NTC), pollen patty with vehicle supplementation (VEH),  
 94 or pollen patty with LX3 supplementation (LX3). Expression of immune or antioxidant genes in the heads (A-I) and guts (J-R) of adult honey  
 95 bees collected pre- and post-supplementation period were quantified via RT-qPCR. Mean  $\pm$  standard deviation (two-way ANOVA with Sidak's  
 96 multiple comparisons) of  $n=18$  adult heads and  $n=18$  adult guts per treatment group with technical duplicate repeats are shown. \* $P<0.05$ ,  
 97 \*\* $P<0.01$ , \*\*\* $P<0.001$ , \*\*\*\* $P<0.0001$ , ns = not significant.

98 **Supplementary Tables**

99 **Supplementary Table 1.** Primers used for qPCR-based quantification of bacteria.

| <b>Target</b>                  | <b>Forward Sequence (5'-3')</b> | <b>Reverse Sequence (5'-3')</b> |
|--------------------------------|---------------------------------|---------------------------------|
| <i>B-actin</i>                 | TTGTATGCCAACACTGTCTTT           | TGGCGGATGATCTTAATTT             |
| <i>Rp5S</i>                    | AATTATTTGGTCGCTGGAATTG          | TAACGTCCAGCAGAATGTGGTA          |
| Total bacteria                 | ACTCCTACGGGAGGCAGCAGT           | ATTACCGCGGCTGCTGGC              |
| Alphaproteobacteria            | CIAGTGTAGAGGTGAAATTC            | CCCCGTCAATTCCTTTGAGTT           |
| Betaproteobacteria             | CTTAGAGATAGGAGAGTG              | TAATGATGGCAACTAATGACAA          |
| Gammaproteobacteria            | TCGTCAGCTCGTGTGTGA              | CGTAAGGGCCATGATG                |
| Bifidobacterium                | TACGGCCGCAAGGCTA                | TCRTCCCCACCTCCTCCG              |
| Bacteroidetes                  | CRAACAGGATTAGATACCCT            | GGTAAGGTTCTCGCGTAT              |
| Firmicutes                     | TGAAACTYAAAGGAATTGACG           | ACCATGCACCACCTGTC               |
| <i>Paenibacillus larvae</i>    | CGGAGACGCCAGGTTAG               | TTCTTCCTTGCCAACAGAGC            |
| <i>Lactobacillus plantarum</i> | ATTCATAGTCTAGTTGGAGGT           | CCTGAACTGAGAGAATTTGA            |
| <i>Lactobacillus rhamnosus</i> | TGCTTGCATCTTGATTTAATTTTG        | GGTTCTTGGATYTATGCGGTATTAG       |
| <i>Lactobacillus kunkeei</i>   | GAGAAGCATTACTAAGCCAAC           | CATATTGACCTTACCACCAGAT          |

100

101

102

103

104

105

106

107

108

109 **Supplementary Table 2.** Primers used for RT-qPCR determination of immune- and antioxidant-  
 110 related gene expression.

| <b>Target</b>                               | <b>Forward Sequence (5'-3')</b> | <b>Reverse Sequence (5'-3')</b> |
|---------------------------------------------|---------------------------------|---------------------------------|
| <i>Alpha-tubulin</i>                        | GCACGTGAAGATCTAGCAGCTC          | GCACCTTCTCCTTCACCTTCAG          |
| <i>Rp5S</i>                                 | AATTATTTGGTCGCTGGAATTG          | TAACGTCCAGCAGAATGTGGTA          |
| <i>Microsomal glutathione-S-transferase</i> | TTGCTCTGTAAGGTTGTTTTGC          | TGTCTGGTTAACTACAAATCCTTCTG      |
| <i>Glucuronyltransferase</i>                | CACGGATACATCCTGCAGTCATC         | GAGAATGACGAGATACAGAACTGTCAC     |
| <i>Defensin-1</i>                           | TGCGCTGCTAACTGTCTCAG            | AATGGCACTTAACCGAAACG            |
| <i>Defensin-2</i>                           | GCAACTACCGCCTTTACGTC            | GGGTAACGTGCGACGTTTTTA           |
| <i>Hymenoptacein</i>                        | CTCTTCTGTGCCGTTGCATA            | CGTCTCCTGTCATTCCATT             |
| <i>Apisimin</i>                             | TGAGCAAAATCGTTGCTGTC            | AACGACATCCACGTTTCGATT           |
| <i>VgMC</i>                                 | AGTTCCGACCGACGACGA              | TTCCCTCCCACGGAGTCC              |
| <i>Apidaecin</i>                            | TAGTCGCGGTATTTGGGAAT            | TTTACGTGCTTCATATTCTTCA          |
| <i>Abaecin</i>                              | CAGCATTCGCATACGTACCA            | GACCAGGAAACGTTGGAAAC            |
| <i>Catalase</i>                             | GTCTTGGCCCAAACAATCTG            | CATTCTCTAGGCCACCAAAA            |
| <i>Lysozyme</i>                             | ACACGGTTGGTCACTGGTCC            | GTCCCACGCTTTGAATCCCT            |

111

112
