# Supplementary material for: Lactobacillus spp. attenuate antibiotic-induced immune and microbiota dysregulation in honey bees
Source: PubMed Central journal article supplement (PMC7519052; doi:10.1038/s42003-020-01259-8), 2020-09-25
Supplement: 42003_2020_1259_MOESM2_ESM.pdf [file 42003_2020_1259_MOESM2_ESM.pdf]

## **Description of Additional Supplementary Files**

File Name: Supplementary Data 1

Description: Source data for taxonomy of corresponding SVs for ALDEx2 effect plot of the adult honey bee microbiota during LX3 supplementation.

File Name: Supplementary Data 2

Description: Source data for immune- and antioxidant-related relative gene expression.

File Name: Supplementary Data 3

Description: Source data for intra-individual correlations between bacterial abundance and innate immune-related gene expression.
