# Supplementary material for: Lactobacillus spp. attenuate antibiotic-induced immune and microbiota dysregulation in honey bees
Source: PubMed Central journal article supplement (PMC7519052; doi:10.1038/s42003-020-01259-8), 2020-09-25
Supplement: 42003_2020_1259_MOESM6_ESM.pdf [file 42003_2020_1259_MOESM6_ESM.pdf]

## Reporting Summary

Nature Research wishes to improve the reproducibility of the work that we publish. This form provides structure for consistency and transparency in reporting. For further information on Nature Research policies, see [Authors & Referees](#) and the [Editorial Policy Checklist](#).

### Statistics

For all statistical analyses, confirm that the following items are present in the figure legend, table legend, main text, or Methods section.

n/a Confirmed

- |                          |                                     |                                                                                                                                                                                                                                                            |
|--------------------------|-------------------------------------|------------------------------------------------------------------------------------------------------------------------------------------------------------------------------------------------------------------------------------------------------------|
| <input type="checkbox"/> | <input checked="" type="checkbox"/> | The exact sample size ( $n$ ) for each experimental group/condition, given as a discrete number and unit of measurement                                                                                                                                    |
| <input type="checkbox"/> | <input checked="" type="checkbox"/> | A statement on whether measurements were taken from distinct samples or whether the same sample was measured repeatedly                                                                                                                                    |
| <input type="checkbox"/> | <input checked="" type="checkbox"/> | The statistical test(s) used AND whether they are one- or two-sided<br><i>Only common tests should be described solely by name; describe more complex techniques in the Methods section.</i>                                                               |
| <input type="checkbox"/> | <input checked="" type="checkbox"/> | A description of all covariates tested                                                                                                                                                                                                                     |
| <input type="checkbox"/> | <input checked="" type="checkbox"/> | A description of any assumptions or corrections, such as tests of normality and adjustment for multiple comparisons                                                                                                                                        |
| <input type="checkbox"/> | <input checked="" type="checkbox"/> | A full description of the statistical parameters including central tendency (e.g. means) or other basic estimates (e.g. regression coefficient) AND variation (e.g. standard deviation) or associated estimates of uncertainty (e.g. confidence intervals) |
| <input type="checkbox"/> | <input checked="" type="checkbox"/> | For null hypothesis testing, the test statistic (e.g. $F$ , $t$ , $r$ ) with confidence intervals, effect sizes, degrees of freedom and $P$ value noted<br><i>Give <math>P</math> values as exact values whenever suitable.</i>                            |
| <input type="checkbox"/> | <input checked="" type="checkbox"/> | For Bayesian analysis, information on the choice of priors and Markov chain Monte Carlo settings                                                                                                                                                           |
| <input type="checkbox"/> | <input checked="" type="checkbox"/> | For hierarchical and complex designs, identification of the appropriate level for tests and full reporting of outcomes                                                                                                                                     |
| <input type="checkbox"/> | <input checked="" type="checkbox"/> | Estimates of effect sizes (e.g. Cohen's $d$ , Pearson's $r$ ), indicating how they were calculated                                                                                                                                                         |

*Our web collection on [statistics for biologists](#) contains articles on many of the points above.*

### Software and code

Policy information about [availability of computer code](#)

|                 |                                                                                                                                                                                                                                                                                                                                                                                                                                                            |
|-----------------|------------------------------------------------------------------------------------------------------------------------------------------------------------------------------------------------------------------------------------------------------------------------------------------------------------------------------------------------------------------------------------------------------------------------------------------------------------|
| Data collection | Quant Studio 5 Real-Time PCR System (Applied Biosystems) software was used to collect qPCR data. MiSeq (Illumina) software was used to collect 16S rRNA sequencing data.                                                                                                                                                                                                                                                                                   |
| Data analysis   | GraphPad Prism (v8.3) was used for statistical analyses throughout the manuscript with specific tests indicated in the methods section and figure legends. QuantStudio Design and Analysis software (Applied Biosystems) was used to analyze qPCR data. DADA2 pipeline with ALDEx2 and associated R software was used to analyze 16S rRNA sequencing data (references to peer reviewed literature on these softwares are provided in the methods section). |

For manuscripts utilizing custom algorithms or software that are central to the research but not yet described in published literature, software must be made available to editors/reviewers. We strongly encourage code deposition in a community repository (e.g. GitHub). See the Nature Research [guidelines for submitting code & software](#) for further information.

### Data

Policy information about [availability of data](#)

All manuscripts must include a [data availability statement](#). This statement should provide the following information, where applicable:

- Accession codes, unique identifiers, or web links for publicly available datasets
- A list of figures that have associated raw data
- A description of any restrictions on data availability

Raw sequence reads for 16S rRNA gene sequencing have been uploaded to the NCBI Sequence Read Archive and are accessible under BioProject ID PRJNA610196. Figure 2 and Figure 3 in the manuscript are associated with this raw data. There are no restrictions on data availability.

## Field-specific reporting

Please select the one below that is the best fit for your research. If you are not sure, read the appropriate sections before making your selection.

Life sciences  Behavioural & social sciences  Ecological, evolutionary & environmental sciences

For a reference copy of the document with all sections, see [nature.com/documents/nr-reporting-summary-flat.pdf](https://www.nature.com/documents/nr-reporting-summary-flat.pdf)

## Ecological, evolutionary & environmental sciences study design

All studies must disclose on these points even when the disclosure is negative.

### Study description

Two separate experiments were performed in two distinct apiaries maintained within a single geographic region near Western University (London, Ontario, Canada). These experimental apiaries were selected based on their geographic inclusion within a boundary assess to have a recent increase of AFB incidence denoted through provincial apiary inspection by the Ontario Ministry of Agriculture and Food and Ministry of Rural Affairs (OMAFRA). Apiary A (N=8 hives) and apiary B (N=8 hives) were subjected to similar experimental designs (Supplementary Figure 1). In each case, all hives received standard treatment with oxytetracycline hydrochloride (catalog number: 0223111, MEDIVET Pharmaceuticals) for two weeks according to manufacturer instructions. Subsequently, hives were longitudinally monitored for an additional four weeks after being randomly assorted into the following experimental groups: (i) a no treatment control group (NTC) that received no supplementation following administration of OTC, (ii) a vehicle control group (VEH) that received a standard 250 g pollen substitute patty (28.5g of soy flour, 74.1g of granulated sucrose, 15.4g of debittered brewer's yeast, 132.1g of a 2:1 [w/v] simple sucrose-based syrup solution) with the addition of 4 mL phosphate-buffered saline (0.01M) once per week, or (iii) a probiotic supplementation group (LX3) that received a 250 g pollen substitute patty infused with Lp39, LGR-1, and LkBR-1 (each at a final concentration of 1×10<sup>9</sup> colony forming units [CFU]/g) once per week. Samples of larvae (third-to-fifth instar) and adult nurse bees (found in close association with brood) were collected from the hives on a weekly basis for the six-week experimental period in apiary A and the four-week supplemental period for apiary B. Accordingly, we focused our downstream analyses recapitulating the effects of oxytetracycline on the adult gut microbiota on apiary A, whereas the combined experimental dataset from apiaries A and B were considered for all other analyses. Hive tools were flame sterilized prior to use between each of the hives and sterile latex gloves were employed to prevent cross-contamination of LX3 strains and potential pathogens.

### Research sample

Honey bees (*Apis mellifera*) were the host insect species studied, though the main focus was on how associated bacterial species existing in their intestinal tract or exogenously supplemented could affect host health parameters. For adults bees, we evaluated only female "nurse" caste members as they are closely associated with brood area and provide a good representation of microbial diversity in the hive. Third-to-fifth instar larvae were chosen for evaluation on the basis that they harbor pathogens of interest in relation to the studied antibiotic, oxytetracycline.

### Sampling strategy

Treatment groups were randomized in relation to physical orientation of hives in the apiary to buffer against environmental factors like edge effects and "robbing" behavior of honey bees. In addition, sampling occurred from four independent hives per treatment group across two temporally segregated sampling periods. This sampling procedure was chosen to ensure reproducibility of our findings at the hive level while accounting for the potential effects of any fluctuating environmental influence.

### Data collection

AP, AC, and KF collected flash frozen honey bee samples in the field and transferred them to a -80° freezer. BD, AP, JC, SG, and KA subsequently processed and analyzed the samples as described in the methods section for each of the experiments.

### Timing and spatial scale

Experiments were performed during June-July 2018 for the first field trial and August-September 2018 for the second field trial.

### Data exclusions

Standard quality assurance measures were performed on the 16S rRNA gene sequencing dataset in the DADA2 which resulted in removal of poor quality reads and chimeras. We have disclosed this in the methods sections and ensured that the raw sequencing reads that were uploaded to the NCBI Sequence Read Archive include these exclusions.

### Reproducibility

Two field trials were performed with both demonstrating similar findings. In addition, we performed extensive sampling of individual honey bees from separate hives subjected to the same treatment thereby demonstrating reproducibility at the hive level as well. Moreover, because innate immune pathways are well conserved in insects, our findings in relation to the effect of bacteria on the honey bee immune system are expected to be highly reproducible in the context of different geographic localities albeit potential variation in environmental influencers.

### Randomization

Treatment groups were randomly assigned to hives and sampling of individuals occurred via haphazardly collecting individuals located with the broad chamber of the hive.

### Blinding

Samples were collected in containers labeled with alphanumeric codes corresponding to the hive they were collected from and then processed in the lab in random order. During subsequent data analysis steps, these labels were matched with the treatment received in order to perform appropriate statistical tests between groups of interest.

Did the study involve field work?  Yes  No

## Field work, collection and transport

### Field conditions

Hive tools were flame sterilized prior to use between each of the hives and sterile latex gloves were employed to prevent cross-contamination of beneficial bacteria as well as potential pathogens. Samples were flash frozen and kept at -80° until

|                          |                                                                                                                  |
|--------------------------|------------------------------------------------------------------------------------------------------------------|
|                          | downstream processing.                                                                                           |
| Location                 | This experiment was performed in London, Ontario Canada. Latitude: 43.02 N, Longitude: 81.28 W, Elevation: 251 m |
| Access and import/export | Not applicable.                                                                                                  |
| Disturbance              | There were no disturbances recorded during our study.                                                            |

## Reporting for specific materials, systems and methods

We require information from authors about some types of materials, experimental systems and methods used in many studies. Here, indicate whether each material, system or method listed is relevant to your study. If you are not sure if a list item applies to your research, read the appropriate section before selecting a response.

### Materials & experimental systems

|                                     |                                                      |
|-------------------------------------|------------------------------------------------------|
| n/a                                 | Involvement in the study                             |
| <input checked="" type="checkbox"/> | <input type="checkbox"/> Antibodies                  |
| <input checked="" type="checkbox"/> | <input type="checkbox"/> Eukaryotic cell lines       |
| <input checked="" type="checkbox"/> | <input type="checkbox"/> Palaeontology               |
| <input type="checkbox"/>            | <input type="checkbox"/> Animals and other organisms |
| <input checked="" type="checkbox"/> | <input type="checkbox"/> Human research participants |
| <input checked="" type="checkbox"/> | <input type="checkbox"/> Clinical data               |

### Methods

|                                     |                                                 |
|-------------------------------------|-------------------------------------------------|
| n/a                                 | Involvement in the study                        |
| <input checked="" type="checkbox"/> | <input type="checkbox"/> ChIP-seq               |
| <input checked="" type="checkbox"/> | <input type="checkbox"/> Flow cytometry         |
| <input checked="" type="checkbox"/> | <input type="checkbox"/> MRI-based neuroimaging |

## Animals and other organisms

Policy information about [studies involving animals](#); [ARRIVE guidelines](#) recommended for reporting animal research

|                         |                                                                                                                                                                                                                                                    |
|-------------------------|----------------------------------------------------------------------------------------------------------------------------------------------------------------------------------------------------------------------------------------------------|
| Laboratory animals      | No laboratory animals were used.                                                                                                                                                                                                                   |
| Wild animals            | Managed honey bees ( <i>Apis mellifera</i> ) were sampled from a total of N=16 hives via collection using sterile forceps followed by flash freezing in microtubes.                                                                                |
| Field-collected samples | Sampling was performed on honey bees housed in standard Langstroth hives that were elevated ~36 inches above ground level using wooden support beams and were exposed to the natural weather patterns to emulate standard conditions in an apiary. |
| Ethics oversight        | Ethics were not required for this study.                                                                                                                                                                                                           |

Note that full information on the approval of the study protocol must also be provided in the manuscript.
